# Supplementary material for: Genetic polymorphisms of Wnt/β-catenin pathway genes are associated with the efficacy and toxicities of radiotherapy in patients with nasopharyngeal carcinoma
Source: PubMed Central journal article supplement (PMC5347711; doi:10.18632/oncotarget.12754), 2016-10-19
Supplement: oncotarget-07-82528-s001.pdf [file oncotarget-07-82528-s001.pdf]

## Genetic polymorphisms of Wnt/ $\beta$ -catenin pathway genes are associated with the efficacy and toxicities of radiotherapy in patients with nasopharyngeal carcinoma

### Supplementary Materials

**Supplementary Table S1: Association between clinical factors and the efficacy of RT directly after treatment and 3 months after treatment in patients with NPC**

| Clinical Characteristics       | After treatment         |        |              |                      |        |              | 3 months after treatment |        |              |                      |        |              |
|--------------------------------|-------------------------|--------|--------------|----------------------|--------|--------------|--------------------------|--------|--------------|----------------------|--------|--------------|
|                                | primary tumor (n = 188) |        |              | lymph node (n = 155) |        |              | primary tumor (n = 135)  |        |              | lymph node (n = 114) |        |              |
|                                | CR                      | Non-CR | P            | CR                   | Non-CR | P            | CR                       | Non-CR | P            | CR                   | Non-CR | P            |
| Age                            |                         |        |              |                      |        |              |                          |        |              |                      |        |              |
| ≤ 50                           | 72                      | 18     | 0.916        | 60                   | 18     | <b>0.001</b> | 62                       | 7      | 0.386        | 54                   | 10     | <b>0.045</b> |
| > 50                           | 79                      | 19     |              | 73                   | 4      |              | 62                       | 4      |              | 48                   | 2      |              |
| Gender                         |                         |        |              |                      |        |              |                          |        |              |                      |        |              |
| male                           | 107                     | 23     | 0.305        | 93                   | 14     | 0.555        | 86                       | 8      | 1.000        | 70                   | 8      | 1.000        |
| female                         | 44                      | 14     |              | 40                   | 8      |              | 38                       | 3      |              | 32                   | 4      |              |
| Drinking                       |                         |        |              |                      |        |              |                          |        |              |                      |        |              |
| Yes                            | 42                      | 5      | <b>0.072</b> | 34                   | 4      | 0.456        | 31                       | 3      | 1.000        | 26                   | 0      | 0.104        |
| No                             | 109                     | 32     |              | 99                   | 18     |              | 93                       | 8      |              | 76                   | 12     |              |
| Smoking                        |                         |        |              |                      |        |              |                          |        |              |                      |        |              |
| Yes                            | 73                      | 13     | 0.148        | 59                   | 11     | 0.622        | 56                       | 6      | 0.549        | 46                   | 6      | 0.747        |
| No                             | 78                      | 24     |              | 74                   | 11     |              | 68                       | 5      |              | 56                   | 6      |              |
| Family history                 |                         |        |              |                      |        |              |                          |        |              |                      |        |              |
| Yes                            | 20                      | 5      | 1.000        | 18                   | 1      | 0.401        | 21                       | 1      | 0.803        | 17                   | 0      | 0.269        |
| No                             | 131                     | 32     |              | 115                  | 21     |              | 103                      | 10     |              | 85                   | 12     |              |
| BMI                            |                         |        |              |                      |        |              |                          |        |              |                      |        |              |
| ≤ 24.0                         | 101                     | 22     | 0.395        | 90                   | 12     | 0.229        | 80                       | 7      | 1.000        | 66                   | 7      | 0.907        |
| > 24.0                         | 50                      | 15     |              | 43                   | 10     |              | 44                       | 4      |              | 36                   | 5      |              |
| Chemotherapy                   |                         |        |              |                      |        |              |                          |        |              |                      |        |              |
| No                             | 32                      | 6      | 0.499        | 21                   | 4      | 1.000        | 24                       | 1      | 0.664        | 13                   | 2      | 1.000        |
| Yes                            | 119                     | 31     |              | 112                  | 18     |              | 100                      | 10     |              | 89                   | 10     |              |
| Tumor classification           |                         |        |              |                      |        |              |                          |        |              |                      |        |              |
| T <sub>1</sub> -T <sub>2</sub> | 45                      | 6      | <b>0.096</b> | 32                   | 7      | 0.437        | 35                       | 1      | 0.308        | 23                   | 3      | 1.000        |
| T <sub>3</sub> -T <sub>4</sub> | 106                     | 31     |              | 101                  | 15     |              | 89                       | 10     |              | 79                   | 9      |              |
| Lymph node metastasis          |                         |        |              |                      |        |              |                          |        |              |                      |        |              |
| N <sub>0</sub> -N <sub>1</sub> | 73                      | 20     | 0.534        | 57                   | 3      | <b>0.009</b> | 61                       | 2      | <b>0.048</b> | 39                   | 3      | 0.560        |
| N <sub>2</sub> -N <sub>3</sub> | 78                      | 17     |              | 76                   | 19     |              | 63                       | 9      |              | 63                   | 9      |              |
| Distant metastasis             |                         |        |              |                      |        |              |                          |        |              |                      |        |              |
| M <sub>0</sub>                 | 147                     | 35     | 0.739        | 130                  | 19     | <b>0.049</b> | 120                      | 10     | 0.351        | 98                   | 11     | 0.433        |
| M <sub>1</sub>                 | 4                       | 2      |              | 3                    | 3      |              | 4                        | 1      |              | 4                    | 1      |              |
| Clinical stage                 |                         |        |              |                      |        |              |                          |        |              |                      |        |              |
| I-II                           | 21                      | 5      | 0.950        | 12                   | 2      | 1.000        | 19                       | 1      | 0.909        | 9                    | 1      | 1.000        |
| III-IV                         | 130                     | 32     |              | 121                  | 20     |              | 105                      | 10     |              | 93                   | 11     |              |
| EBV-DNA                        |                         |        |              |                      |        |              |                          |        |              |                      |        |              |
| Negative                       | 46                      | 15     | 0.241        | 35                   | 4      | 0.415        | 43                       | 1      | 0.162        | 26                   | 3      | 1.000        |
| Positive                       | 105                     | 22     |              | 98                   | 18     |              | 81                       | 10     |              | 76                   | 9      |              |

Abbreviations: RT, radiotherapy; BMI, body mass index. P value < 0.1 is shown in bold.

**Supplementary Table S2: The association between clinical factors and the acute radiation-induced toxic reactions**

| Clinical characteristics       | Dermatitis ( <i>n</i> = 188) |           |          | Oral mucositis ( <i>n</i> = 188) |           |              | Myelosuppression ( <i>n</i> = 188) |           |              |
|--------------------------------|------------------------------|-----------|----------|----------------------------------|-----------|--------------|------------------------------------|-----------|--------------|
|                                | Grade 0–2                    | Grade 3–4 | <i>P</i> | Grade 0–2                        | Grade 3–4 | <i>P</i>     | Grade 0–2                          | Grade 3–4 | <i>P</i>     |
| Age                            |                              |           |          |                                  |           |              |                                    |           |              |
| ≤ 50                           | 81                           | 9         | 0.483    | 49                               | 41        | 0.639        | 67                                 | 23        | 0.504        |
| > 50                           | 91                           | 7         |          | 50                               | 48        |              | 77                                 | 21        |              |
| Gender                         |                              |           |          |                                  |           |              |                                    |           |              |
| male                           | 119                          | 11        | 0.971    | 66                               | 64        | 0.437        | 102                                | 28        | 0.366        |
| female                         | 53                           | 5         |          | 33                               | 25        |              | 42                                 | 16        |              |
| Drinking                       |                              |           |          |                                  |           |              |                                    |           |              |
| Yes                            | 43                           | 4         | 1.000    | 23                               | 24        | 0.555        | 36                                 | 11        | 1.000        |
| No                             | 129                          | 12        |          | 76                               | 65        |              | 108                                | 33        |              |
| Smoking                        |                              |           |          |                                  |           |              |                                    |           |              |
| Yes                            | 77                           | 9         | 0.378    | 44                               | 42        | 0.706        | 69                                 | 17        | 0.280        |
| No                             | 95                           | 7         |          | 55                               | 47        |              | 75                                 | 27        |              |
| Family history                 |                              |           |          |                                  |           |              |                                    |           |              |
| Yes                            | 23                           | 2         | 0.922    | 14                               | 11        | 0.719        | 19                                 | 6         | 0.940        |
| No                             | 149                          | 14        |          | 85                               | 78        |              | 125                                | 38        |              |
| BMI                            |                              |           |          |                                  |           |              |                                    |           |              |
| ≤ 24.0                         | 115                          | 8         | 0.175    | 59                               | 64        | <b>0.076</b> | 91                                 | 32        | 0.245        |
| > 24.0                         | 57                           | 8         |          | 40                               | 25        |              | 53                                 | 12        |              |
| Chemotherapy                   |                              |           |          |                                  |           |              |                                    |           |              |
| No                             | 35                           | 3         | 0.879    | 21                               | 17        | 0.719        | 37                                 | 1         | <b>0.001</b> |
| Yes                            | 137                          | 13        |          | 78                               | 72        |              | 107                                | 43        |              |
| Tumor classification           |                              |           |          |                                  |           |              |                                    |           |              |
| T <sub>1</sub> –T <sub>2</sub> | 46                           | 5         | 0.698    | 31                               | 20        | 0.173        | 44                                 | 7         | <b>0.056</b> |
| T <sub>3</sub> –T <sub>4</sub> | 126                          | 11        |          | 68                               | 69        |              | 100                                | 37        |              |
| Lymph node metastasis          |                              |           |          |                                  |           |              |                                    |           |              |
| N <sub>0</sub> –N <sub>1</sub> | 86                           | 7         | 0.632    | 49                               | 44        | 0.994        | 71                                 | 22        | 0.936        |
| N <sub>2</sub> –N <sub>3</sub> | 86                           | 9         |          | 50                               | 45        |              | 73                                 | 22        |              |
| Distant metastasis             |                              |           |          |                                  |           |              |                                    |           |              |
| M <sub>0</sub>                 | 167                          | 15        | 0.467    | 96                               | 86        | 1.000        | 139                                | 43        | 0.692        |
| M <sub>1</sub>                 | 5                            | 1         |          | 3                                | 3         |              | 5                                  | 1         |              |
| Clinical stage                 |                              |           |          |                                  |           |              |                                    |           |              |
| I–II                           | 23                           | 3         | 0.551    | 14                               | 12        | 0.896        | 22                                 | 4         | 0.298        |
| III–IV                         | 149                          | 13        |          | 85                               | 77        |              | 122                                | 40        |              |
| EBV–DNA                        |                              |           |          |                                  |           |              |                                    |           |              |
| Negative                       | 57                           | 4         | 0.506    | 31                               | 30        | 0.726        | 47                                 | 14        | 0.919        |
| Positive                       | 115                          | 12        |          | 68                               | 59        |              | 97                                 | 30        |              |

Abbreviations: RT, radiotherapy; BMI, body mass index. *P* value < 0.1 is shown in bold.

**Supplementary Table S3: Association between SNPs in WNT/ $\beta$ -catenin pathway genes and the efficacy of RT at the primary tumor after treatment**

| SNP        | Genotype distribution <sup>a</sup> |                    | Model     | Unadjusted        |          | Adjusted <sup>b</sup> |          |
|------------|------------------------------------|--------------------|-----------|-------------------|----------|-----------------------|----------|
|            | non-CR (MAF)                       | CR (MAF)           |           | OR (95% CI)       | <i>P</i> | OR (95% CI)           | <i>P</i> |
| rs10487362 | 6/23/8<br>(0.47)                   | 37/68/46<br>(0.47) | allelic   | 1.01 (0.61–1.68)  | 0.966    | —                     | —        |
|            |                                    |                    | additive  | 1.01 (0.61–1.67)  | 0.966    | 0.99 (0.59–1.67)      | 0.968    |
|            |                                    |                    | dominant  | 1.59 (0.67–3.74)  | 0.290    | 1.43 (0.60–3.43)      | 0.417    |
|            |                                    |                    | recessive | 0.60 (0.23–1.54)  | 0.286    | 0.63 (0.24–1.66)      | 0.350    |
| rs2896218  | 2/19/16<br>(0.31)                  | 8/68/75<br>(0.28)  | allelic   | 1.17 (0.67–2.03)  | 0.577    | —                     | —        |
|            |                                    |                    | additive  | 1.20 (0.66–2.19)  | 0.549    | 1.22 (0.66–2.26)      | 0.530    |
|            |                                    |                    | dominant  | 1.30 (0.63–2.67)  | 0.484    | 1.28 (0.61–2.68)      | 0.509    |
|            |                                    |                    | recessive | 1.02 (0.21–5.02)  | 0.979    | 1.16 (0.22–5.98)      | 0.861    |
| rs6947329  | 9/16/11<br>(0.47)                  | 38/69/44<br>(0.48) | allelic   | 0.97 (0.58–1.62)  | 0.904    | —                     | —        |
|            |                                    |                    | additive  | 0.97 (0.59–1.59)  | 0.908    | 0.99 (0.59–1.64)      | 0.961    |
|            |                                    |                    | dominant  | 0.93 (0.42–2.06)  | 0.867    | 0.91 (0.41–2.03)      | 0.814    |
|            |                                    |                    | recessive | 0.99 (0.43–2.29)  | 0.984    | 1.08 (0.46–2.53)      | 0.867    |
| rs454886   | 4/21/12<br>(0.39)                  | 31/3/117<br>(0.38) | allelic   | 1.05 (0.62–1.77)  | 0.860    | —                     | —        |
|            |                                    |                    | additive  | 1.05 (0.62–1.79)  | 0.858    | 1.01 (0.59–1.73)      | 0.976    |
|            |                                    |                    | dominant  | 1.30 (0.61–2.79)  | 0.501    | 1.26 (0.58–2.73)      | 0.562    |
|            |                                    |                    | recessive | 0.71 (0.23–2.20)  | 0.554    | 0.65 (0.21–2.05)      | 0.463    |
| rs1880481  | 3/18/16<br>(0.32)                  | 9/51/91<br>(0.23)  | allelic   | 1.62 (0.92–2.83)  | 0.092    | 1.61 (0.91–2.87)      | 0.104    |
|            |                                    |                    | additive  | 1.62 (0.92–2.83)  | 0.092    | 1.61 (0.91–2.87)      | 0.104    |
|            |                                    |                    | dominant  | 1.99 (0.96–4.12)  | 0.064    | 2.05 (0.97–4.32)      | 0.060    |
|            |                                    |                    | recessive | 1.39 (0.36–5.42)  | 0.633    | 1.25 (0.31–5.04)      | 0.753    |
| rs3864004  | 3/15/19<br>(0.28)                  | 4/63/83<br>(0.24)  | allelic   | 1.28 (0.72–2.26)  | 0.399    | —                     | —        |
|            |                                    |                    | additive  | 1.33 (0.72–2.46)  | 0.369    | 1.3 (0.7–2.42)        | 0.414    |
|            |                                    |                    | dominant  | 1.17 (0.57–2.41)  | 0.663    | 1.18 (0.56–2.45)      | 0.665    |
|            |                                    |                    | recessive | 3.22 (0.69–15.06) | 0.137    | 2.74 (0.56–13.4)      | 0.214    |
| rs3755557  | 1/9/27<br>(0.15)                   | 8/39/104<br>(0.18) | allelic   | 0.78 (0.39–1.59)  | 0.498    | —                     | —        |
|            |                                    |                    | additive  | 0.80 (0.41–1.57)  | 0.522    | 0.84 (0.43–1.67)      | 0.627    |
|            |                                    |                    | dominant  | 0.82 (0.37–1.83)  | 0.627    | 0.87 (0.38–1.97)      | 0.732    |
|            |                                    |                    | recessive | 0.50 (0.06–4.10)  | 0.516    | 0.55 (0.06–4.62)      | 0.578    |

<sup>a</sup>In the order of homozygote / heterozygote / wild type.

<sup>b</sup>Adjusted for T stage and drinking status.

Abbreviations: MAF, minor allele frequency; OR, odds ratio; CI, confidence interval. *P* value < 0.05 is shown in bold.

**Supplementary Table S4: Association between SNPs in WNT/ $\beta$ -catenin pathway genes and the efficacy of RT at the primary tumor 3 months after treatment**

| SNP        | Genotype distribution <sup>a</sup> |                    | Model     | Unadjusted        |          | Adjusted <sup>b</sup> |          |
|------------|------------------------------------|--------------------|-----------|-------------------|----------|-----------------------|----------|
|            | non-CR(MAF)                        | CR (MAF)           |           | OR (95% CI)       | <i>P</i> | OR (95% CI)           | <i>P</i> |
| rs10487362 | 3/4/4<br>(0.45)                    | 30/63/31<br>(0.50) | allelic   | 0.85 (0.35–2.03)  | 0.710    | —                     | —        |
|            |                                    |                    | additive  | 0.85 (0.35–2.03)  | 0.711    | 0.85 (0.35–2.03)      | 0.711    |
|            |                                    |                    | dominant  | 0.58 (0.16–2.13)  | 0.414    | 0.58 (0.16–2.13)      | 0.414    |
|            |                                    |                    | recessive | 1.18 (0.29–4.71)  | 0.820    | 1.18 (0.29–4.71)      | 0.820    |
| rs2896218  | 1/3/7<br>(0.23)                    | 4/60/60<br>(0.27)  | allelic   | 0.78 (0.28–2.19)  | 0.635    | —                     | —        |
|            |                                    |                    | additive  | 0.74 (0.24–2.29)  | 0.600    | 0.74 (0.24–2.29)      | 0.600    |
|            |                                    |                    | dominant  | 0.54 (0.15–1.92)  | 0.338    | 0.54 (0.15–1.92)      | 0.338    |
| rs6947329  | 3/2/6<br>(0.36)                    | 33/57/33<br>(0.50) | recessive | 3.00 (0.31–29.46) | 0.346    | 3.00 (0.31–29.46)     | 0.346    |
|            |                                    |                    | allelic   | 0.57 (0.23–1.41)  | 0.220    | —                     | —        |
|            |                                    |                    | additive  | 0.60 (0.26–1.43)  | 0.253    | 0.6 (0.26–1.43)       | 0.253    |
| rs454886   | 0/6/5<br>(0.27)                    | 20/61/43<br>(0.41) | dominant  | 0.31 (0.09–1.07)  | 0.063    | 0.31 (0.09–1.07)      | 0.063    |
|            |                                    |                    | recessive | 1.02 (0.26–4.09)  | 0.975    | 1.02 (0.26–4.09)      | 0.975    |
|            |                                    |                    | allelic   | 0.55 (0.21–1.44)  | 0.216    | —                     | —        |
| rs1880481  | 2/4/5<br>(0.36)                    | 7/43/74<br>(0.23)  | additive  | 0.53 (0.20–1.44)  | 0.214    | 0.53 (0.20–1.44)      | 0.214    |
|            |                                    |                    | dominant  | 0.64 (0.18–2.21)  | 0.477    | 0.64 (0.18–2.21)      | 0.477    |
|            |                                    |                    | recessive | —                 | 0.997    | —                     | 0.997    |
| rs3864004  | 1/4/6<br>(0.27)                    | 4/49/70<br>(0.23)  | allelic   | 1.92 (0.76–4.79)  | 0.160    | —                     | —        |
|            |                                    |                    | additive  | 1.86 (0.75–4.59)  | 0.177    | 1.86 (0.75–4.59)      | 0.177    |
|            |                                    |                    | dominant  | 1.78 (0.51–6.14)  | 0.364    | 1.78 (0.51–6.14)      | 0.364    |
| rs3755557  | 1/2/8<br>(0.18)                    | 7/34/83<br>(0.19)  | recessive | 3.71 (0.67–20.57) | 0.133    | 3.71 (0.67–20.57)     | 0.133    |
|            |                                    |                    | allelic   | 1.24 (0.46–3.33)  | 0.664    | —                     | —        |
|            |                                    |                    | additive  | 1.28 (0.45–3.63)  | 0.648    | 1.28 (0.45–3.63)      | 0.648    |
| rs3755557  | 1/2/8<br>(0.18)                    | 7/34/83<br>(0.19)  | dominant  | 1.10 (0.32–3.80)  | 0.880    | 1.10 (0.32–3.80)      | 0.880    |
|            |                                    |                    | recessive | 2.98 (0.30–29.21) | 0.350    | 2.98 (0.3–29.21)      | 0.350    |
|            |                                    |                    | allelic   | 0.93 (0.30–2.86)  | 0.894    | —                     | —        |
| rs3755557  | 1/2/8<br>(0.18)                    | 7/34/83<br>(0.19)  | additive  | 0.93 (0.32–2.69)  | 0.901    | 0.93 (0.32–2.69)      | 0.901    |
|            |                                    |                    | dominant  | 0.76 (0.19–3.01)  | 0.695    | 0.76 (0.19–3.01)      | 0.695    |
|            |                                    |                    | recessive | 1.67 (0.19–14.97) | 0.646    | 1.67 (0.19–14.97)     | 0.646    |

<sup>a</sup>In the order of homozygote / heterozygote / wild type; <sup>b</sup> Adjusted for N stage.

Abbreviations: MAF, minor allele frequency; OR, odds ratio; CI, confidence interval. *P* value < 0.05 is shown in bold.

**Supplementary Table S5: Association between SNPs in WNT/ $\beta$ -catenin pathway genes with the efficacy of RT at the lymph node after treatment**

| SNP        | Genotype distribution <sup>a</sup> |                    | Model     | Unadjusted        |       | Adjusted <sup>b</sup> |       |
|------------|------------------------------------|--------------------|-----------|-------------------|-------|-----------------------|-------|
|            | non-CR (MAF)                       | CR (MAF)           |           | OR (95% CI)       | P     | OR (95% CI)           | P     |
| rs10487362 | 7/9/6<br>(0.52)                    | 27/64/42<br>(0.44) | allelic   | 1.37 (0.73–2.60)  | 0.329 | —                     | —     |
|            |                                    |                    | additive  | 1.35 (0.72–2.53)  | 0.343 | 1.51 (0.76–2.99)      | 0.235 |
|            |                                    |                    | dominant  | 1.23 (0.45–3.37)  | 0.686 | 1.44 (0.48–4.35)      | 0.518 |
|            |                                    |                    | recessive | 1.83 (0.68–4.94)  | 0.231 | 2.14 (0.71–6.44)      | 0.175 |
| rs2896218  | 2/8/12<br>(0.27)                   | 7/63/63<br>(0.29)  | allelic   | 0.92 (0.45–1.88)  | 0.820 | —                     | —     |
|            |                                    |                    | additive  | 0.91 (0.43–1.95)  | 0.809 | 0.88 (0.38–2.02)      | 0.760 |
|            |                                    |                    | dominant  | 0.75 (0.30–1.86)  | 0.534 | 0.68 (0.25–1.83)      | 0.441 |
|            |                                    |                    | recessive | 1.80 (0.35–9.29)  | 0.483 | 2.22 (0.36–13.82)     | 0.391 |
| rs6947329  | 6/10/6<br>(0.50)                   | 33/60/39<br>(0.48) | allelic   | 1.1 (0.58–2.07)   | 0.780 | —                     | —     |
|            |                                    |                    | additive  | 1.09 (0.59–2.00)  | 0.789 | 1.15 (0.60–2.21)      | 0.681 |
|            |                                    |                    | dominant  | 1.12 (0.41–3.07)  | 0.828 | 1.34 (0.44–4.11)      | 0.606 |
|            |                                    |                    | recessive | 1.13 (0.41–3.11)  | 0.821 | 1.10 (0.37–3.30)      | 0.868 |
| rs454886   | 3/11/8<br>(0.39)                   | 17/63/53<br>(0.36) | allelic   | 1.10 (0.57–2.11)  | 0.782 | —                     | —     |
|            |                                    |                    | additive  | 1.10 (0.57–2.14)  | 0.779 | 1.42 (0.67–3.00)      | 0.365 |
|            |                                    |                    | dominant  | 1.16 (0.45–2.96)  | 0.757 | 1.62 (0.56–4.66)      | 0.372 |
|            |                                    |                    | recessive | 1.08 (0.29–4.03)  | 0.912 | 1.45 (0.34–6.18)      | 0.619 |
| rs1880481  | 4/7/11<br>(0.34)                   | 6/51/76<br>(0.24)  | allelic   | 1.67 (0.84–3.30)  | 0.141 | —                     | —     |
|            |                                    |                    | additive  | 1.67 (0.84–3.33)  | 0.147 | 1.71 (0.81–3.6)       | 0.156 |
|            |                                    |                    | dominant  | 1.33 (0.54–3.29)  | 0.533 | 1.54 (0.57–4.22)      | 0.397 |
|            |                                    |                    | recessive | 4.70 (1.21–18.29) | 0.025 | 3.79 (0.84–17.17)     | 0.084 |
| rs3864004  | 1/9/12<br>(0.25)                   | 5/55/72<br>(0.25)  | allelic   | 1.02 (0.49–2.13)  | 0.957 | —                     | —     |
|            |                                    |                    | additive  | 1.02 (0.47–2.25)  | 0.954 | 1.16 (0.49–2.76)      | 0.735 |
|            |                                    |                    | dominant  | 1.00 (0.40–2.48)  | 1.000 | 1.16 (0.42–3.17)      | 0.775 |
|            |                                    |                    | recessive | 1.21 (0.13–10.87) | 0.865 | 1.38 (0.13–14.84)     | 0.792 |
| rs3755557  | 1/6/15<br>(0.18)                   | 6/31/96<br>(0.16)  | allelic   | 1.15 (0.50–2.65)  | 0.738 | —                     | —     |
|            |                                    |                    | additive  | 1.13 (0.52–2.47)  | 0.754 | 1.11 (0.47–2.63)      | 0.815 |
|            |                                    |                    | dominant  | 1.21 (0.46–3.21)  | 0.700 | 1.13 (0.39–3.28)      | 0.824 |
|            |                                    |                    | recessive | 1.01 (0.12–8.80)  | 0.994 | 1.18 (0.12–11.97)     | 0.889 |

<sup>a</sup>In the order of homozygote / heterozygote / wild type.

<sup>b</sup>Adjusted for N stage, M stage and age.

Abbreviations: MAF, minor allele frequency; OR, odds ratio; CI, confidence interval. P value < 0.05 is shown in bold.

**Supplementary Table S6: Association between SNPs in WNT/ $\beta$ -catenin pathway genes and the efficacy of RT at the lymph node 3 months after treatment**

| SNP        | Genotype distribution <sup>a</sup> |                    | Model     | Unadjusted        |              | Adjusted <sup>b</sup> |              |
|------------|------------------------------------|--------------------|-----------|-------------------|--------------|-----------------------|--------------|
|            | non-CR (MAF)                       | CR (MAF)           |           | OR (95% CI)       | <i>P</i>     | OR (95% CI)           | <i>P</i>     |
| rs10487362 | 4/5/3<br>(0.54)                    | 24/50/28<br>(0.48) | allelic   | 1.28 (0.55–2.99)  | 0.570        | —                     | —            |
|            |                                    |                    | additive  | 1.27 (0.55–2.93)  | 0.577        | 1.38 (0.59–3.26)      | 0.462        |
|            |                                    |                    | dominant  | 1.14 (0.29–4.50)  | 0.857        | 1.25 (0.31–5.06)      | 0.758        |
|            |                                    |                    | recessive | 1.63 (0.45–5.87)  | 0.459        | 1.86 (0.49–6.97)      | 0.360        |
| rs2896218  | 0/5/7<br>(0.21)                    | 4/48/50<br>(0.27)  | allelic   | 0.70 (0.25–1.95)  | 0.489        | —                     | —            |
|            |                                    |                    | additive  | 0.65 (0.21–1.98)  | 0.445        | 0.65 (0.21–2.00)      | 0.456        |
|            |                                    |                    | dominant  | 0.69 (0.2–2.31)   | 0.543        | 0.71 (0.21–2.43)      | 0.584        |
| rs6947329  | 4/4/4<br>(0.50)                    | 28/45/28<br>(0.50) | recessive | —                 | 0.999        | NA                    | 0.999        |
|            |                                    |                    | allelic   | 1.00 (0.43–2.33)  | 1.000        | —                     | —            |
|            |                                    |                    | additive  | 1.00 (0.45–2.22)  | 1.000        | 0.98 (0.44–2.19)      | 0.962        |
|            |                                    |                    | dominant  | 0.77 (0.21–2.75)  | 0.684        | 0.75 (0.21–2.77)      | 0.671        |
| rs454886   | 2/5/5<br>(0.38)                    | 15/50/37<br>(0.39) | recessive | 1.30 (0.36–4.67)  | 0.684        | 1.26 (0.34–4.61)      | 0.732        |
|            |                                    |                    | allelic   | 0.93 (0.39–2.23)  | 0.871        | —                     | —            |
|            |                                    |                    | additive  | 0.93 (0.39–2.24)  | 0.870        | 1.02 (0.42–2.51)      | 0.966        |
|            |                                    |                    | dominant  | 0.80 (0.24–2.69)  | 0.715        | 0.89 (0.26–3.07)      | 0.849        |
| rs1880481  | 3/3/6<br>(0.38)                    | 6/36/60<br>(0.24)  | recessive | 1.16 (0.23–5.83)  | 0.857        | 1.35 (0.26–7.09)      | 0.723        |
|            |                                    |                    | allelic   | 1.95 (0.80–4.74)  | 0.135        | —                     | —            |
|            |                                    |                    | additive  | 1.85 (0.78–4.36)  | 0.160        | 1.82 (0.76–4.31)      | 0.177        |
|            |                                    |                    | dominant  | 1.43 (0.43–4.74)  | 0.560        | 1.44 (0.43–4.90)      | 0.555        |
| rs3864004  | 2/4/6<br>(0.33)                    | 3/40/58<br>(0.23)  | recessive | 5.33 (1.14–25.01) | <b>0.034</b> | 5.05 (1.02–25.03)     | <b>0.048</b> |
|            |                                    |                    | allelic   | 1.70 (0.68–4.21)  | 0.251        | —                     | —            |
|            |                                    |                    | additive  | 1.78 (0.68–4.68)  | 0.240        | 1.78 (0.64–4.94)      | 0.270        |
|            |                                    |                    | dominant  | 1.35 (0.41–4.47)  | 0.625        | 1.21 (0.35–4.10)      | 0.765        |
| rs3755557  | 1/2/9<br>(0.17)                    | 5/27/70<br>(0.18)  | recessive | 6.53 (0.97–43.85) | 0.053        | 10.94 (1.24–96.68)    | 0.031        |
|            |                                    |                    | allelic   | 0.90 (0.29–2.80)  | 0.859        | —                     | —            |
|            |                                    |                    | additive  | 0.91 (0.32–2.65)  | 0.868        | 0.94 (0.32–2.79)      | 0.914        |
|            |                                    |                    | dominant  | 0.73 (0.18–2.88)  | 0.652        | 0.75 (0.19–3.01)      | 0.681        |
|            |                                    |                    | recessive | 1.76 (0.19–16.5)  | 0.619        | 1.98 (0.20–20.00)     | 0.562        |

<sup>a</sup>In the order of homozygote / heterozygote / wild type.

<sup>b</sup>Adjusted for age.

Abbreviations: MAF, minor allele frequency; OR, odds ratio; CI, confidence interval; NA, not applicable. *P* value < 0.05 is shown in bold.

**Supplementary Table S7: Association between SNPs in WNT/ $\beta$ -catenin pathway genes and acute grade 3–4 radiation-induced oral mucositis**

| SNP        | Genotype distribution <sup>a</sup> |                    | Model     | Unadjusted        |          | Adjusted <sup>b</sup> |              |
|------------|------------------------------------|--------------------|-----------|-------------------|----------|-----------------------|--------------|
|            | Grade 3–4 (MAF)                    | Grade 0–2 (MAF)    |           | OR (95% CI)       | <i>P</i> | OR (95% CI)           | <i>P</i>     |
| rs10487362 | 21/45/23<br>(0.49)                 | 22/46/31<br>(0.45) | allelic   | 1.15 (0.76–1.72)  | 0.507    | —                     | —            |
|            |                                    |                    | additive  | 1.14 (0.77–1.71)  | 0.513    | 1.17 (0.78–1.76)      | 0.443        |
|            |                                    |                    | dominant  | 1.31 (0.69–2.47)  | 0.408    | 1.35 (0.71–2.56)      | 0.364        |
|            |                                    |                    | recessive | 1.08 (0.55–2.14)  | 0.823    | 1.12 (0.56–2.23)      | 0.743        |
| rs2896218  | 6/45/38<br>(0.32)                  | 4/42/53<br>(0.25)  | allelic   | 1.39 (0.89–2.19)  | 0.146    | —                     | —            |
|            |                                    |                    | additive  | 1.47 (0.90–2.40)  | 0.120    | 1.5 (0.91–2.46)       | 0.110        |
|            |                                    |                    | dominant  | 1.55 (0.87–2.75)  | 0.138    | 1.63 (0.91–2.93)      | 0.102        |
|            |                                    |                    | recessive | 1.72 (0.47–6.29)  | 0.415    | 1.50 (0.40–5.58)      | 0.542        |
| rs6947329  | 23/38/27<br>(0.48)                 | 24/47/28<br>(0.48) | allelic   | 0.99 (0.66–1.49)  | 0.961    | —                     | —            |
|            |                                    |                    | additive  | 0.99 (0.67–1.46)  | 0.963    | 1.01 (0.68–1.49)      | 0.979        |
|            |                                    |                    | dominant  | 0.89 (0.47–1.67)  | 0.719    | 0.89 (0.47–1.68)      | 0.721        |
|            |                                    |                    | recessive | 1.11 (0.57–2.14)  | 0.766    | 1.16 (0.59–2.25)      | 0.674        |
| rs454886   | 17/43/29<br>(0.43)                 | 9/49/41<br>(0.34)  | allelic   | 1.49 (0.98–2.26)  | 0.061    | —                     | —            |
|            |                                    |                    | additive  | 1.52 (0.99–2.34)  | 0.058    | 1.57 (1.01–2.43)      | <b>0.045</b> |
|            |                                    |                    | dominant  | 1.46 (0.81–2.66)  | 0.212    | 1.50 (0.82–2.73)      | 0.191        |
|            |                                    |                    | recessive | 2.36 (0.99–5.61)  | 0.052    | 2.54 (1.06–6.13)      | <b>0.038</b> |
| rs1880481  | 7/32/50<br>(0.26)                  | 5/37/57<br>(0.24)  | allelic   | 1.12 (0.70–1.79)  | 0.637    | —                     | —            |
|            |                                    |                    | additive  | 1.12 (0.70–1.78)  | 0.639    | 1.16 (0.72–1.85)      | 0.549        |
|            |                                    |                    | dominant  | 1.06 (0.59–1.89)  | 0.847    | 1.1 (0.61–1.97)       | 0.752        |
|            |                                    |                    | recessive | 1.61 (0.49–5.25)  | 0.434    | 1.69 (0.51–5.61)      | 0.390        |
| rs3864004  | 4/38/47<br>(0.26)                  | 3/40/55<br>(0.23)  | allelic   | 1.14 (0.71–1.82)  | 0.595    | —                     | —            |
|            |                                    |                    | additive  | 1.16 (0.70–1.92)  | 0.570    | 1.22 (0.73–2.04)      | 0.447        |
|            |                                    |                    | dominant  | 1.14 (0.64–2.03)  | 0.650    | 1.2 (0.67–2.15)       | 0.546        |
|            |                                    |                    | recessive | 1.49 (0.32–6.85)  | 0.608    | 1.73 (0.37–8.14)      | 0.490        |
| rs3755557  | 7/24/58<br>(0.21)                  | 2/24/73<br>(0.14)  | allelic   | 1.65 (0.96–2.82)  | 0.067    | —                     | —            |
|            |                                    |                    | additive  | 1.57 (0.94–2.63)  | 0.086    | 1.62 (0.96–2.73)      | 0.071        |
|            |                                    |                    | dominant  | 1.50 (0.80–2.80)  | 0.203    | 1.57 (0.83–2.95)      | 0.166        |
|            |                                    |                    | recessive | 4.14 (0.84–20.48) | 0.082    | 4.21 (0.84–21.04)     | 0.080        |

<sup>a</sup>In the order of homozygote / heterozygote / wild type.

<sup>b</sup>Adjusted for BMI.

Abbreviations: MAF, minor allele frequency; OR, odds ratio; CI, confidence interval. *P* value < 0.05 is shown in bold.

**Supplementary Table S8: Association between SNPs in WNT/ $\beta$ -catenin pathway genes and acute grade 3–4 radiation-induced dermatitis**

| SNP        | Genotype distribution <sup>a</sup> |                    | Model     | OR (95% CI)      | <i>P</i>     |
|------------|------------------------------------|--------------------|-----------|------------------|--------------|
|            | Grade 3–4 (MAF)                    | Grade 0–2 (MAF)    |           |                  |              |
| rs10487362 | 3/6/7<br>(0.38)                    | 40/85/47<br>(0.48) | allelic   | 0.65 (0.31–1.37) | 0.257        |
|            |                                    |                    | additive  | 0.66 (0.31–1.38) | 0.267        |
|            |                                    |                    | dominant  | 0.48 (0.17–1.37) | 0.172        |
|            |                                    |                    | recessive | 0.46 (0.18–1.17) | 0.102        |
| rs2896218  | 0/7/9<br>(0.22)                    | 10/80/82<br>(0.29) | allelic   | 0.68 (0.29–1.63) | 0.388        |
|            |                                    |                    | additive  | 0.65 (0.26–1.63) | 0.356        |
|            |                                    |                    | dominant  | 0.71 (0.25–1.99) | 0.513        |
|            |                                    |                    | recessive | 2.30 (0.62–8.55) | 0.214        |
| rs6947329  | 4/6/5<br>(0.47)                    | 43/79/50<br>(0.48) | allelic   | 0.95 (0.45–2.01) | 0.891        |
|            |                                    |                    | additive  | 0.95 (0.47–1.95) | 0.896        |
|            |                                    |                    | dominant  | 0.82 (0.27–2.52) | 0.729        |
|            |                                    |                    | recessive | 0.88 (0.39–1.95) | 0.746        |
| rs454886   | 1/7/8<br>(0.28)                    | 25/85/62<br>(0.39) | allelic   | 0.61 (0.27–1.35) | 0.216        |
|            |                                    |                    | additive  | 0.59 (0.26–1.35) | 0.212        |
|            |                                    |                    | dominant  | 0.56 (0.20–1.58) | 0.274        |
|            |                                    |                    | recessive | 1.25 (0.49–3.19) | 0.649        |
| rs1880481  | 1/6/9<br>(0.25)                    | 11/63/98<br>(0.25) | allelic   | 1.02 (0.44–2.35) | 0.971        |
|            |                                    |                    | additive  | 1.02 (0.44–2.33) | 0.971        |
|            |                                    |                    | dominant  | 1.03 (0.37–2.89) | 0.955        |
|            |                                    |                    | recessive | 1.10 (0.28–4.25) | 0.893        |
| rs3864004  | 0/8/8<br>(0.25)                    | 7/70/94<br>(0.25)  | allelic   | 1.02 (0.44–2.37) | 0.956        |
|            |                                    |                    | additive  | 1.03 (0.42–2.52) | 0.953        |
|            |                                    |                    | dominant  | 1.22 (0.44–3.40) | 0.703        |
|            |                                    |                    | recessive | 0.55 (0.06–4.68) | 0.582        |
| rs3755557  | 2/6/8<br>(0.31)                    | 7/42/123<br>(0.31) | allelic   | 2.34 (1.05–5.21) | <b>0.033</b> |
|            |                                    |                    | additive  | 2.13 (1.00–4.55) | 0.051        |
|            |                                    |                    | dominant  | 2.51 (0.89–7.06) | 0.081        |
|            |                                    |                    | recessive | 0.40 (0.05–3.25) | 0.388        |

<sup>a</sup>In the order of homozygote / heterozygote / wild type.

Abbreviations: MAF, minor allele frequency; OR, odds ratio; CI, confidence interval. *P* value < 0.05 is shown in bold.



**Supplementary Table S9: Association between SNPs in WNT/ $\beta$ -catenin pathway genes and acute grade 3–4 radiation-induced dermatitis myelosuppression**

| SNP        | Genotype distribution <sup>a</sup> |                    | Model     | Unadjusted       |          | Adjusted <sup>b</sup> |          |
|------------|------------------------------------|--------------------|-----------|------------------|----------|-----------------------|----------|
|            | Grade 3–4 (MAF)                    | Grade 0–2 (MAF)    |           | OR (95% CI)      | <i>P</i> | OR (95% CI)           | <i>P</i> |
| rs10487362 | 6/29/9<br>(0.47)                   | 37/62/45<br>(0.47) | allelic   | 0.98 (0.60–1.57) | 0.917    | —                     | —        |
|            |                                    |                    | additive  | 0.98 (0.61–1.56) | 0.919    | 0.95 (0.58–1.56)      | 0.849    |
|            |                                    |                    | dominant  | 1.77 (0.78–3.99) | 0.170    | 1.79 (0.77–4.14)      | 0.175    |
|            |                                    |                    | recessive | 0.46 (0.18–1.17) | 0.102    | 0.42 (0.16–1.11)      | 0.081    |
| rs2896218  | 4/23/17<br>(0.35)                  | 6/64/74<br>(0.26)  | allelic   | 1.52 (0.91–2.53) | 0.108    | —                     | —        |
|            |                                    |                    | additive  | 1.64 (0.93–2.87) | 0.086    | 1.54 (0.86–2.75)      | 0.143    |
|            |                                    |                    | dominant  | 1.68 (0.84–3.35) | 0.141    | 1.63 (0.8–3.33)       | 0.182    |
| rs6947329  | 10/22/11<br>(0.49)                 | 37/63/44<br>(0.48) | recessive | 2.30 (0.62–8.55) | 0.214    | 1.88 (0.48–7.34)      | 0.362    |
|            |                                    |                    | allelic   | 1.05 (0.65–1.70) | 0.836    | —                     | —        |
|            |                                    |                    | additive  | 1.05 (0.66–1.66) | 0.843    | 1.06 (0.66–1.70)      | 0.808    |
|            |                                    |                    | dominant  | 1.28 (0.59–2.77) | 0.531    | 1.45 (0.65–3.21)      | 0.363    |
| rs454886   | 7/18/19<br>(0.36)                  | 19/74/51<br>(0.39) | recessive | 0.88 (0.39–1.95) | 0.746    | 0.80 (0.35–1.82)      | 0.588    |
|            |                                    |                    | allelic   | 0.90 (0.55–1.47) | 0.670    | —                     | —        |
|            |                                    |                    | additive  | 0.89 (0.54–1.48) | 0.664    | 0.81 (0.48–1.37)      | 0.441    |
|            |                                    |                    | dominant  | 0.72 (0.36–1.44) | 0.352    | 0.64 (0.31–1.32)      | 0.230    |
| rs1880481  | 3/13/28<br>(0.22)                  | 9/56/79<br>(0.26)  | recessive | 1.25 (0.49–3.19) | 0.649    | 1.08 (0.41–2.86)      | 0.881    |
|            |                                    |                    | allelic   | 0.80 (0.45–1.41) | 0.435    | —                     | —        |
|            |                                    |                    | additive  | 0.80 (0.45–1.41) | 0.439    | 0.65 (0.36–1.17)      | 0.152    |
| rs3864004  | 1/15/27<br>(0.20)                  | 6/63/75<br>(0.26)  | dominant  | 0.69 (0.35–1.39) | 0.305    | 0.54 (0.26–1.13)      | 0.103    |
|            |                                    |                    | recessive | 1.10 (0.28–4.25) | 0.893    | 0.78 (0.19–3.10)      | 0.720    |
|            |                                    |                    | allelic   | 0.70 (0.39–1.27) | 0.236    | —                     | —        |
|            |                                    |                    | additive  | 0.67 (0.35–1.25) | 0.207    | 0.53 (0.27–1.03)      | 0.059    |
| rs3755557  | 1/12/31<br>(0.16)                  | 8/36/100<br>(0.18) | dominant  | 0.64 (0.32–1.30) | 0.218    | 0.5 (0.24–1.05)       | 0.067    |
|            |                                    |                    | recessive | 0.55 (0.06–4.68) | 0.582    | 0.38 (0.04–3.27)      | 0.376    |
|            |                                    |                    | allelic   | 0.86 (0.45–1.64) | 0.643    | —                     | —        |
|            |                                    |                    | additive  | 0.87 (0.47–1.61) | 0.662    | 0.83 (0.44–1.56)      | 0.560    |
|            |                                    |                    | dominant  | 0.95 (0.46–1.99) | 0.899    | 0.90 (0.42–1.95)      | 0.793    |
|            |                                    |                    | recessive | 0.40 (0.05–3.25) | 0.388    | 0.36 (0.04–3.05)      | 0.350    |

<sup>a</sup>In the order of / heterozygote / wild type.

<sup>b</sup>Adjusted for T stage and chemotherapy.

Abbreviations: MAF, minor allele homozygote le frequency; OR, odds ratio; CI, confidence interval. *P* value < 0.05 is shown in bold.

## Supplementary Table S10: Primer sequences for 9 SNPs in genotyping

| SNP-ID     | Forward primer                 | Reverse primer                  | Extension primer             |
|------------|--------------------------------|---------------------------------|------------------------------|
| rs10487362 | ACGTTGGATGTGCCCTCCAAGAGTAAAAG  | ACGTTGGATGGTGAACATAATGCATCAGCAG | ATTCATCAGCAGACTATATCTATCG    |
| rs2896218  | ACGTTGGATGCTAGGAATGTCTTCCTTTTG | ACGTTGGATGAATCCAACACAGAGCGGAC   | ACAGTCACGAGGCAT              |
| rs6947329  | ACGTTGGATGATCATTCCAGCCTCTCCCC  | ACGTTGGATGACCACAAGTACCTTCAAGGC  | CCTCCCACCCTAGGTTCTAATTT      |
| rs3777860  | ACGTTGGATGACCAGGAAAGTGGTGTATGC | ACGTTGGATGACTGCAAGCACTCATGCTGG  | GGGAAGGTCACCTGGCACATTTCAA    |
| rs454886   | ACGTTGGATGTATGCAGTAAGAGAAGAAG  | ACGTTGGATGGTCAGCTCTCCTTTCTTTGG  | CTAGGCCTCATTTTGTATCATATAAAAC |
| rs4135385  | ACGTTGGATGGGAGTTACTTGTTCCTTTTG | ACGTTGGATGAGCAAGGAAGAATAGAAAAGC | CATGAAAATTCTCAAAAAGTACACTAA  |
| rs1880481  | ACGTTGGATGCCCGTGCTTAATTCTTAGTC | ACGTTGGATGGCTGTCAATTTCTCCATAAC  | CTCCATAACACTCATTCTAATTTA     |
| rs3864004  | ACGTTGGATGAGGACTTGTGAATTGCGGG  | ACGTTGGATGTTCTGTCCCACTCACGAAG   | GTGAACTCTCCGTAGAA            |
| rs3755557  | ACGTTGGATGCCTGCAGAGTCATCTCTTTC | ACGTTGGATGGTTTCAAAGCAAGAGCCAGG  | CTACTCTGATCAAATATAGGTCCTTT   |
